# Supplementary material for: The efficacy of plasma exosomal miRNAs as predictive biomarkers for PD-1 blockade plus chemotherapy in gastric cancer
Source: PubMed Central journal article supplement — Transl Cancer Res. 2024 Nov 27;13(11):6336–46. doi: 10.21037/tcr-24-2151 (PMC11651786; doi:10.21037/tcr-24-2151), 2024-11-27
Supplement: tcr-13-11-6336-dss.pdf [file tcr-13-11-6336-dss.pdf]

## Data Sharing Statement

|                     |                                                                                                                                                     |                                                                                                                  |
|---------------------|-----------------------------------------------------------------------------------------------------------------------------------------------------|------------------------------------------------------------------------------------------------------------------|
| <b>Article Info</b> | <a href="https://dx.doi.org/10.21037/tcr-24-2151">https://dx.doi.org/10.21037/tcr-24-2151</a>                                                       |                                                                                                                  |
| <b>Item</b>         | <b>Question</b>                                                                                                                                     | <b>Authors' Response<br/>(place "-" if not applicable)</b>                                                       |
| 1                   | Would you like to share data collected for your study to others?                                                                                    | Yes.                                                                                                             |
| 2                   | If not, would you like to share the reason for your decision?                                                                                       | -                                                                                                                |
| 3                   | What data in particular will be shared?                                                                                                             | The miRNA sequencing data mentioned in the article can be shared.                                                |
| 4                   | Any other documents will be shared? Such as study protocol, statistical analysis plan, informed consent form, clinical study report, analytic code. | If necessary, the statistical analysis plan and research protocol can also be shared.                            |
| 5                   | When will data availability begin?                                                                                                                  | From the publication date.                                                                                       |
| 6                   | When will data availability end?                                                                                                                    | Two years within the publication date.                                                                           |
| 7                   | To whom will you share the data?                                                                                                                    | Experts in immunotherapy for gastrointestinal malignancies and medical oncologists.                              |
| 8                   | For what type of analysis or purpose?                                                                                                               | Research on predictive biomarkers for the efficacy of PD-1 inhibitors in gastric cancer treatment.               |
| 9                   | How or where can the data/documents be obtained?                                                                                                    | Emails could be sent to the address below to obtain the shared data: hyqyfr@126.com.                             |
| 10                  | Any other restrictions?                                                                                                                             | We may balance the potential benefits and risks for each request and then provide the data that could be shared. |
